# Supplementary material for: A Highly Predictive MicroRNA Panel for Determining Delayed Cerebral Vasospasm Risk Following Aneurysmal Subarachnoid Hemorrhage
Source: Front Mol Biosci. 2021 May 14;8:657258. doi: 10.3389/fmolb.2021.657258 (PMC8163224; doi:10.3389/fmolb.2021.657258)
Supplement: Supplementary File 1 — The file contains (1) variables without missing data; (2) DCV prediction cutoff value; (3) CSF dataset; (4) plasma dataset. [file Data_Sheet_1.xlsx]

## Sheet: Variables without missing data
miRNAs (variables)
let-7b-5p	(perfect discrimination between DCV+ and DCV-)
miR-125b-5p
miR-1274b
miR-132-3p
miR-142-3p
miR-146a-5p
miR-146b-5p
miR-150-5p
miR-15b-5p	(perfect discrimination between DCV+ and DCV-)
miR-16-5p
miR-17-5p	(perfect discrimination between DCV+ and DCV-)
miR-195-5p
miR-19b-3p	(perfect discrimination between DCV+ and DCV-)
miR-204-5p
miR-20a-5p	(perfect discrimination between DCV+ and DCV-)
miR-21-5p
miR-221-3p
miR-223-3p
miR-23a-3p
miR-24-3p	(perfect discrimination between DCV+ and DCV-)
miR-27a-3p
miR-29a-3p	(perfect discrimination between DCV+ and DCV-)
miR-34a-5p
miR-34b-3p
miR-92a-3p
miR-451a

## Sheet: DCV prediction cutoff value
Predictor	Upper Bound of 'Yes'	Lower Bound of 'No'	Cutoff (Mean)	Overall Accuracy	Sensitivity	Specificity
let-7b-5p	0.0161834	0.480183	0.248183	0.8	1	0.625
miR-15b-5p	-0.23713	0.16187	-0.0376301	0.8	1	0.625
miR-17-5p	-0.777579	-0.427579	-0.602579	0.866667	1	0.75
miR-19b-3p	-0.988555	0.0274448	-0.480555	0.933333	1	0.875
miR-20a-5p	-1.17801	-0.671012	-0.924512	0.866667	1	0.75
miR-24-3p	-0.225545	0.204455	-0.0105448	0.666667	0.714286	0.625
miR-29a-3p	0.313995	0.746995	0.530495	0.933333	1	0.875

## Sheet: CSF raw data
GroupA
Case	Collection date	DCV	let-7a-5p	let-7b-5p	let-7c-5p	miR-103a-3p	miR-125b-5p	miR-1274b	miR-1298-5p	miR-132-3p	miR-142-3p	miR-142-5p	miR-146a-5p	miR-146b-5p	miR-150-5p	miR-155-5p	miR-15b-5p	miR-16-5p	miR-17-5p	miR-181a-5p	miR-181c-5p	miR-195-5p	miR-19b-3p	miR-204-5p	miR-20a-5p	miR-21-5p	miR-221-3p	miR-223-3p	miR-23a-3p	miR-23b-3p	miR-24-3p	miR-27a-3p	miR-27b-3p	miR-29a-3p	miR-29c-3p	miR-34a-5p	miR-34b-3p	miR-497-5p	miR-9-5p	miR-92a-3p	miR-124-3p	miR-451a
Patient1	PBD3	Yes	-0.667563	-0.217817	-0.570986	-0.262219	2.45932	1.42428	-0.581603	1.49526	-1.10171	-0.969186	-0.0301338	0.606231	-0.00115753	-0.672607	-1.00813	-2.17867	-0.777579	1.39142	-0.597118	-1.9976	-0.988555	-0.962587	-1.23301	0.0867103	0.574323	-2.51186	-0.240299	UD	-1.09354	-1.14104	0.398128	0.111995	-0.494164	0.167813	-0.156011	1.3053	3.88466	-1.40885	UD	-1.62319
Patient7	PBD3	Yes	-3.43056	-8.60582	-10.398	-7.00022	-10.5367	-11.5417	-4.0226	-8.74874	-4.48171	-2.67019	-4.44713	-7.92377	-4.32916	-2.33361	-4.64613	-5.37067	-6.84658	-9.57758	-8.32612	-7.6366	-5.97956	-1.99559	-6.17901	-4.24629	-7.80968	-7.73886	-4.5413	-7.03885	-8.13954	-6.23404	-8.64187	-9.632	-10.4382	-7.55319	-1.79201	-7.4337	-8.94734	-2.08085	-9.69812	-5.02719
Patient12	PBD3	Yes	-3.71156	-4.57182	-5.78899	-0.512219	-5.67768	-3.34772	0.435397	-5.28074	-0.469707	-0.231186	-2.63113	-2.90077	-1.11916	0.196393	-1.49113	-1.43967	-2.29758	-4.08358	-3.66112	-3.9206	-2.25156	-1.37159	-2.46701	-1.45529	-3.95368	-1.33786	-1.6873	-3.41785	-3.73354	-2.84804	-4.53987	-5.23	-6.05616	-3.84119	-1.24301	-3.8697	-3.95434	-0.619851	-5.53312	-2.07819
Patient13	PBD3	Yes	-2.20556	-3.16182	-3.59799	-1.52022	-3.55868	-1.12772	-0.228603	-2.47774	-2.75471	-0.920186	-1.67813	-1.26777	-0.630158	0.0933933	-1.91313	-2.16267	-2.43858	-3.25558	-1.24512	-2.1036	-2.04856	-2.06559	-2.75401	-2.49129	-1.82568	-0.254861	-2.0273	-2.40885	-1.61554	-1.55004	-3.30287	-2.078	-1.76216	-1.84919	-2.14601	-3.0347	-3.21534	-2.16985	-2.93412	-3.06919
Patient14	PBD3	Yes	-2.17556	-2.98882	-2.52299	-2.05322	-1.81768	-0.128723	0.394397	-0.888743	-3.29971	-1.47519	-1.70213	-1.36177	-1.56016	-0.888607	-2.76913	-3.48567	-3.68358	-0.485581	1.26088	-3.8566	-3.28856	-2.66859	-4.04801	-3.64629	-0.928677	-1.25186	-1.7673	-1.63485	-0.812545	-2.13504	-0.623872	-0.876005	-1.35616	-2.32819	-2.11301	-2.0157	-0.794344	-3.11585	-1.50712	-5.64019
Patient15	PBD3	Yes	UD	-0.438817	0.573014	0.763781	0.452322	-1.06772	0.512397	0.424257	-0.595707	-0.202186	-0.300134	-0.0127694	-0.658158	-2.20361	-0.25713	-0.169666	-0.898579	0.694419	1.90188	-0.501602	-1.27056	-0.188587	-1.17801	0.55971	-0.192677	-4.91386	1.3967	1.52615	-0.580545	-0.0690392	0.489128	0.313995	0.526836	-0.0761875	0.465989	0.694296	0.568656	-0.857851	1.67788	-0.881193
Patient16	PBD3	Yes	-0.832563	0.0161834	0.409014	2.83778	1.41032	0.613277	-0.0896028	1.12126	-1.32971	-0.170186	0.0908662	-0.296769	-1.57016	0.768393	-0.23713	-0.796666	-1.30858	0.666419	1.74388	-0.754602	-1.01256	-0.857587	-1.17901	0.90971	1.06132	-1.83386	-0.564299	2.50515	-0.225545	0.353961	-0.814872	0.211995	0.646836	1.05081	-1.30901	-0.426704	1.77666	-1.42485	UD	-1.61819
Patient17	PBD3	Yes	-2.12156	-2.75582	-2.82599	-3.07622	-1.91568	-0.261723	-0.317603	-1.90074	-4.52171	-3.13419	-4.63513	-3.19777	-4.72216	1.47339	-4.01613	-3.99167	-3.65358	-2.40458	-2.10712	-4.2336	-2.80756	-1.35259	-3.21801	-1.99929	-2.11868	-1.49186	-2.6423	-0.424845	-3.47854	-3.02604	-2.83987	-3.121	-2.66316	-1.64719	-3.28801	-3.7897	-2.76334	-3.30385	-2.24412	-3.85519
Patient3	PBD3	No	4.00444	0.480183	0.00601407	0.325781	2.27832	1.29628	1.3694	1.07126	0.109293	-0.171186	-0.464134	0.754231	-1.23816	UD	0.78987	-2.04967	0.198421	2.68342	-0.369118	-1.9496	0.310445	-0.0435871	0.0369879	-0.98529	0.217323	1.04014	-0.523299	UD	0.204455	-0.327039	1.84613	1.056	0.367836	0.0748125	-0.0500112	0.0382962	2.05566	-1.41585	1.24588	-1.96819
Patient2	PBD3	No	-0.0105626	2.17918	2.47701	2.14778	2.86032	2.94128	1.2754	2.54026	1.21529	2.11581	1.79587	1.78923	1.08884	1.73739	1.54387	2.01233	2.48742	4.24342	3.20488	1.3424	2.54444	-1.06459	1.68199	2.19271	2.01732	0.617139	1.2167	1.96215	2.21446	1.83896	2.16913	2.309	2.94484	3.06281	-1.14501	1.1153	2.46766	2.47615	UD	1.56281
Patient4	PBD3	No	-1.23356	0.540183	0.634014	UD	1.27432	0.860277	1.0354	0.648257	0.410293	-0.134186	0.153866	0.0232306	-0.669158	0.734393	0.47387	0.838334	-0.427579	2.19742	4.37988	-0.0166024	0.0274448	0.824413	-0.450012	1.07371	0.447323	-0.582861	0.735701	1.01415	0.288455	0.613961	0.703128	0.746995	0.269836	0.536813	0.914989	3.6953	3.41666	-0.338851	1.68388	-0.738193
Patient5	PBD3	No	2.25344	2.19018	1.49501	2.08778	1.68232	2.66328	0.396397	2.18926	0.801293	1.31381	1.46587	1.77323	1.74184	-0.463607	0.70287	1.84633	1.52942	3.77242	UD	1.5944	1.70744	-0.136587	1.51099	1.72471	1.59532	0.423139	0.470701	2.11215	1.70646	0.267961	UD	1.264	2.44584	1.80681	-0.828011	1.9313	1.67966	1.79715	UD	1.81981
Patient6	PBD3	No	UD	2.03518	6.78301	UD	1.25132	2.14128	UD	1.25626	6.30329	UD	-0.629134	2.26123	0.952842	UD	3.42287	2.84833	3.35842	UD	UD	2.7164	2.59944	2.31641	3.25999	-1.61329	0.263323	2.46514	0.273701	2.41215	1.51946	0.960961	3.90013	1.254	2.02384	-0.181187	0.532989	1.1453	UD	1.58915	UD	2.31881
Patient8	PBD3	No	UD	3.35418	1.23401	2.33078	3.40332	0.877277	-0.160603	2.52426	1.67429	5.63781	1.43087	1.18323	0.953842	1.25839	4.28687	2.61233	2.30642	UD	UD	1.9884	2.10644	0.706413	2.49899	2.00171	1.69132	1.04714	1.1757	2.13315	1.99546	3.17596	UD	2.454	2.38184	2.24881	0.771989	5.3193	2.77566	0.846149	3.11788	1.94481
Patient9	PBD3	No	3.00144	2.61218	2.97001	1.54678	2.49632	1.30628	0.508397	2.87026	1.97329	2.05481	2.17387	2.57623	1.99284	-1.16261	2.18587	1.61433	1.47042	5.70342	UD	1.6864	1.22844	1.47541	1.21499	1.32371	1.49632	1.45514	0.807701	UD	2.49246	1.65596	1.87913	2.326	2.23784	1.18681	1.57199	2.9143	UD	0.294149	UD	0.500807
Patient10	PBD3	No	1.52344	0.941183	0.0780141	1.39878	2.49832	1.95628	0.537397	2.06126	0.618293	1.12281	0.307866	1.53523	0.159842	1.80439	1.21287	-0.506666	-0.254579	1.51142	3.72388	0.0033976	0.363445	-0.0445871	-0.671012	0.95971	2.05932	2.31814	1.8547	UD	2.29546	1.76596	3.43313	2.45	1.92784	1.29681	1.78499	1.6143	2.85566	0.0971495	2.77588	-0.611193
Patient11	PBD3	No	5.67744	3.13218	1.95901	3.22678	3.26932	-0.370723	0.121397	3.12026	1.25729	1.95981	2.03387	1.63123	1.35884	UD	2.03787	2.92233	2.09342	UD	UD	3.1324	1.83244	-0.0985871	1.52999	2.76571	1.57632	1.05814	3.4417	5.16115	2.98946	3.07096	3.56013	3.523	2.09084	1.49281	0.926989	6.1153	1.94966	1.37615	3.49388	2.80881
Patient18	PBD3	No	1.17444	1.54018	3.04801	0.898781	2.39532	1.70228	-0.277603	3.51326	-0.644707	2.57681	1.32787	1.68623	1.00884	1.52639	0.16187	0.463334	0.169421	1.71642	-0.559118	0.808398	0.825445	-0.766587	0.0349879	2.19171	2.81132	2.90314	1.6467	UD	2.22746	2.28796	2.42113	2.306	2.13084	2.33781	-1.50501	1.9313	UD	0.646149	UD	0.290807
Patient1	PBD7	Yes	UD	0.219183	2.61301	0.997781	-0.253678	1.28828	-0.263603	1.23626	2.34129	2.06181	0.712866	1.23923	2.35284	0.458393	1.61287	-0.212666	1.74142	2.78742	4.23288	-0.105602	0.225445	0.416413	1.21599	-1.29929	0.170323	0.321139	-0.682299	0.213155	0.253455	0.134961	2.74713	0.796995	0.842836	-1.58119	1.14699	-1.1087	5.77066	-1.13185	3.32488	-1.32119
Patient7	PBD7	Yes	UD	0.428183	1.71701	2.82678	-0.834678	-0.769723	-0.0546028	-1.81074	-0.0327067	1.34781	-0.826134	-1.49477	2.17584	0.682393	0.70487	2.92133	-0.0935788	0.174419	1.75288	2.7744	-0.499555	0.893413	0.466988	-1.11029	-1.80068	-2.09586	-0.0092992	1.50815	0.0194552	1.04496	1.55813	-0.424005	-1.02116	-1.05819	1.81999	-1.2407	0.431656	-0.0708505	-2.26112	2.45781
Patient12	PBD7	Yes	UD	0.580183	1.89901	1.47578	-0.0546777	-0.174723	UD	0.536257	2.50329	2.49481	0.607866	1.22723	4.02184	0.377393	3.23287	3.25233	2.13242	0.167419	2.08988	2.3804	0.637445	3.27241	2.24499	0.20771	0.216323	0.850139	0.443701	UD	1.75046	1.67896	1.76913	0.666995	1.55684	0.479813	1.70899	1.5663	1.69666	0.871149	-1.79312	1.65481
Patient13	PBD7	Yes	-2.38056	-2.74182	-3.35399	-3.26522	-2.60268	0.0912775	-0.465603	-1.69474	-5.34471	-3.50119	-4.68513	-3.96777	-6.13716	-0.971607	-3.68013	-3.43567	-3.99458	-2.57358	-2.61612	-3.0916	-3.47456	-1.88459	-3.79101	-2.19329	-1.07468	-4.96486	-2.2713	-2.08185	-3.02554	-2.12104	-3.05287	-2.814	-3.31116	-0.0821875	-3.08301	-3.1567	-1.98034	-2.84085	-1.04212	-3.47219
Patient14	PBD7	Yes	-2.20556	-3.68382	-2.95999	-2.59322	-3.55368	-1.32672	-0.126603	-1.91674	-3.95571	-1.53019	-1.78013	-1.90177	-1.88316	-0.370607	-3.02713	-4.08967	-5.82158	-2.32158	-0.717118	-4.1586	-5.50156	-0.991587	-5.94101	-2.12529	-2.02068	-3.43786	0.0077008	-2.16085	-2.97554	-0.656039	-1.49487	-2.843	-1.84316	-1.57619	-0.786011	-2.6607	-3.10534	-4.75385	-2.53212	-6.02019
Patient15	PBD7	Yes	-0.994563	-4.69582	-4.89399	-4.59022	-3.52668	-4.50172	-2.0186	-5.33674	-8.13471	-6.54719	-3.85413	-7.88877	-5.68816	-4.24361	-6.90613	-6.00767	-6.33358	-5.61958	-5.38212	-6.0796	-6.20956	-2.39959	-5.97201	-4.37429	-3.85368	-10.4999	-5.1003	-3.79885	-8.96554	-7.39704	-4.37987	-6.527	-7.03916	-1.81219	-1.05001	-1.3597	-4.26034	-2.21885	-1.96812	-0.713193
Patient16	PBD7	Yes	-0.649563	-1.11482	-0.448986	0.324781	2.06832	0.0942775	-0.148603	0.641257	-2.18871	-0.669186	-1.58513	-1.31977	-3.10716	0.0653933	-1.57013	-1.98867	-2.71058	-0.215581	1.60388	-1.6206	-2.20156	-0.114587	-2.67801	-0.41429	0.219323	-2.34986	-0.357299	UD	-0.497545	-0.322039	1.45413	0.310995	0.0878362	-0.0141875	-0.747011	0.981296	1.22466	-2.44785	UD	-3.28119
Patient17	PBD7	Yes	1.81444	-0.604817	-0.656986	-0.840219	-0.466678	0.0722775	0.0293972	-0.730743	-1.46971	-0.730186	-1.03313	-0.755769	0.652842	-0.245607	-1.41513	-2.90067	-1.66958	-0.144581	2.55488	-2.0176	-2.11656	-0.130587	-1.68901	-2.74429	-1.15068	-0.851861	-0.832299	0.375155	-1.73154	-1.84604	0.0301277	-0.818005	-1.17416	-1.15919	-0.191011	-1.1097	0.435656	-3.20885	1.69288	-3.38919
Patient3	PBD7	No	UD	1.50418	3.56801	1.43978	-0.117678	0.787277	UD	1.28426	2.34529	2.87581	-0.246134	1.23823	0.960842	UD	UD	1.42833	3.53742	1.28642	2.79588	1.4404	2.47644	1.45941	3.29699	-2.44829	0.122323	3.44414	-0.397299	0.468155	1.51446	0.801961	2.14313	1.168	1.23884	-1.24419	2.49199	-0.567704	2.60866	-0.198851	1.88488	0.483807
Patient2	PBD7	No	UD	-0.0218166	0.540014	1.51878	-1.21168	0.760277	0.123397	-0.192743	0.769293	1.70481	-0.791134	0.139231	-0.414158	-1.11961	2.08987	1.55333	1.88942	3.22142	UD	0.128398	0.950445	-0.248587	0.948988	-2.76529	-0.939677	-0.0698613	-1.0963	0.496155	0.141455	-0.269039	0.349128	0.510995	1.33784	-1.03119	0.497989	-1.6767	0.686656	-1.06485	2.12788	-0.541193
Patient4	PBD7	No	-0.232563	-3.17682	-1.96899	-0.807219	-0.770678	-2.25372	-0.0626028	-1.97574	-2.25371	-3.15019	-3.25113	-2.57077	-5.17716	0.694393	-3.22813	-3.04067	-4.04858	-0.981581	0.017882	-3.1466	-3.52256	0.906413	-4.26901	-2.81229	-1.43768	-4.40486	-2.3923	-0.0818451	-2.59254	-2.59304	-0.711872	-2.72	-2.96916	-1.00619	-0.176011	-0.811704	UD	-3.07285	1.04588	-4.33619
Patient5	PBD7	No	-2.67856	-1.06182	-1.32699	UD	-1.50568	0.0262775	0.303397	-1.34274	0.333293	0.887814	-0.700134	0.794231	0.672842	1.73539	0.15087	-0.0176662	0.190421	1.11742	2.74888	-1.0986	0.177445	-0.280587	0.00498789	-0.0352897	0.120323	1.85414	0.0697008	-1.17285	0.0104552	-0.359039	-0.755872	-0.0870047	-1.17116	-0.498187	-1.32101	-1.6237	-0.309344	0.612149	-0.690119	-0.572193
Patient6	PBD7	No	-0.260563	-3.06482	-3.29499	UD	-3.67268	-2.75272	-4.2266	-2.73974	1.55129	0.787814	-1.79313	-1.06077	1.39784	0.178393	0.52787	0.588334	-0.794579	-2.34658	-1.02612	-1.1116	-1.23156	-4.25359	-1.20501	-2.52629	-2.81868	-0.679861	-0.522299	-2.16285	-2.34454	-0.997039	-2.17887	-3.17	-2.58016	-2.83219	-2.84601	-3.0427	-1.55534	-0.217851	-2.89812	0.304807
Patient8	PBD7	No	UD	1.12418	2.58801	2.27078	1.22432	0.825277	-0.204603	0.960257	0.482293	1.59181	-0.0421338	-0.313769	0.641842	1.27539	1.90187	1.85233	1.10842	0.489419	1.60288	2.4464	1.63644	0.225413	1.31299	-0.0562897	0.740323	-0.604861	1.4367	2.48915	0.479455	0.866961	2.10713	0.784995	1.06184	0.182813	1.56299	0.905296	UD	1.37115	3.18388	2.18581
Patient9	PBD7	No	0.251437	-2.35582	-1.57699	-0.808219	-1.67668	-1.75672	0.347397	-2.46874	-1.98871	-2.43119	-2.65313	-2.60077	-2.01516	1.38439	-3.03613	-3.03767	-3.22058	-1.38258	-0.848118	-3.0016	-3.29656	-0.300587	-3.61701	-4.37829	-2.68868	-4.16186	-2.6593	0.214155	-2.88454	-2.85904	-0.720872	-2.828	-3.58516	-2.36919	1.59699	-1.3437	UD	-2.50985	UD	-3.75819
Patient10	PBD7	No	-0.618563	-5.58782	-6.30199	-2.16722	-6.38568	-4.08272	-0.621603	-5.28074	-3.60471	-1.94719	-2.94413	-4.79577	-1.21716	-1.64061	-3.41113	-3.15567	-4.98358	-6.51458	-5.29212	-4.0326	-4.63856	-1.07759	-5.00401	-3.53429	-4.54068	-4.22886	-2.4423	-4.16585	-4.72154	-3.71304	-4.95287	-5.933	-4.97716	-3.59119	-1.83301	-4.7787	-4.04634	-2.18985	-5.76912	-4.11019
Patient11	PBD7	No	5.15244	2.64018	3.02201	UD	2.75732	0.548277	0.925397	3.06626	2.17929	UD	2.67087	2.74123	3.59184	-1.97861	3.18787	4.05933	3.03342	4.31042	UD	3.6544	1.54644	0.901413	2.80599	1.46171	1.68532	1.97014	UD	2.51315	3.94046	-0.101039	UD	3.109	3.23384	2.29081	1.77199	4.5983	UD	1.68115	UD	2.45681
Patient18	PBD7	No	1.89644	2.03818	3.19101	1.87678	1.62132	0.914277	1.4394	2.04626	0.143293	3.74781	1.17887	1.78923	2.45684	1.29139	2.06287	1.93433	0.781421	2.62942	-1.16512	1.8624	0.936445	2.26541	0.950988	-2.10029	0.578323	3.61114	0.698701	UD	0.805455	0.804961	UD	1.63	2.95584	-0.673187	1.90999	-0.878704	UD	0.371149	UD	0.436807
HC1			-0.347563	4.53518	1.85201	UD	-2.40568	7.72828	0.0633972	2.11926	UD	UD	7.19487	0.901231	2.25884	2.66239	1.27087	2.97633	UD	UD	-1.82812	-2.2686	2.35344	4.38741	0.884988	7.83771	-1.73768	8.71614	4.2247	-2.50985	3.69046	0.896961	-0.544872	UD	-1.27616	2.91081	2.69599	-1.9827	-1.30334	UD	UD	-18.3642
HC2			3.41144	3.23518	0.917014	UD	3.50332	1.87128	0.998397	5.53326	UD	UD	4.13587	3.66123	3.44684	2.01439	UD	UD	6.33842	UD	1.42788	5.7304	6.03444	0.302413	5.88099	5.58371	5.23832	6.48114	5.3187	UD	3.36446	4.55596	2.83613	3.757	4.86384	3.98281	0.326989	3.3453	3.07166	4.65715	5.11588	7.10981
HC3			UD	4.57218	0.384014	UD	3.85032	2.40328	UD	UD	4.74829	UD	3.48287	5.37923	1.10584	-1.53361	4.85887	5.47633	5.79042	UD	UD	6.7364	6.61344	1.43041	6.40099	6.02571	2.40232	6.76814	2.5237	2.52515	3.63746	2.37996	UD	5.826	4.85184	3.10081	0.633989	2.8683	UD	5.56315	3.34288	6.87581
HC4			UD	2.20618	4.66201	UD	3.24932	2.61728	1.3074	6.18426	5.21729	UD	2.52287	3.98523	0.895842	-6.62461	UD	4.35433	3.53842	3.70442	UD	3.4804	4.05844	0.793413	3.31899	4.75171	3.43632	6.92114	1.9857	2.25515	2.45446	2.47796	4.70513	2.99	2.37784	2.38381	-0.296011	1.8833	UD	3.00615	4.33988	3.80381
HC5			UD	6.60618	3.58501	UD	6.50532	2.51128	0.988397	UD	5.10329	UD	6.33587	UD	3.52784	1.12439	5.96787	UD	7.53742	UD	UD	6.4204	6.98944	2.04141	9.30599	6.02571	4.59232	8.89114	UD	UD	4.36846	4.79896	UD	4.424	5.42184	UD	0.970989	2.1773	UD	6.40715	5.25388	11.6878
HC6			UD	3.95218	7.32601	UD	4.15032	0.403277	UD	5.09726	3.37229	UD	2.43987	5.56023	2.23584	2.28439	UD	7.12633	5.98442	UD	UD	6.7544	5.60644	0.933413	6.99699	3.93771	3.71732	6.77214	3.2087	2.43415	4.79146	3.36996	2.90613	5.357	3.88284	3.71981	1.24199	3.3553	UD	5.51315	UD	9.32381
HC7			UD	3.88218	2.86201	UD	3.40932	3.34528	1.8634	UD	4.79829	UD	3.29587	5.09323	2.64384	1.68439	UD	6.27533	5.03542	UD	3.84688	6.6084	5.78044	0.929413	6.65699	5.31271	5.31432	5.72614	1.7777	UD	4.52846	2.00196	2.65813	3.897	3.97184	3.46681	1.05699	2.3433	2.93466	6.14615	3.31588	7.24081
HC8			UD	4.66018	UD	2.84078	4.42632	2.04628	UD	UD	7.76929	UD	4.30687	4.84923	4.28784	1.80039	5.30687	UD	6.07942	6.16042	UD	6.2394	5.86344	1.51341	6.73199	5.66371	3.21032	7.70614	1.8437	3.03015	6.19046	4.69996	UD	4.694	5.72284	5.71481	1.44999	2.7043	UD	5.18715	UD	9.50681
GroupB
Case	Collection	DCV	let-7a-5p	let-7b-5p	let-7c-5p	miR-103a-3p	miR-125b-5p	miR-1274b	miR-1298-5p	miR-132-3p	miR-142-3p	miR-142-5p	miR-146a-5p	miR-146b-5p	miR-150-5p	miR-155-5p	miR-15b-5p	miR-16-5p	miR-17-5p	miR-181a-5p	miR-181c-5p	miR-195-5p	miR-19b-3p	miR-204-5p	miR-20a-5p	miR-21-5p	miR-221-3p	miR-223-3p	miR-23a-3p	miR-23b-3p	miR-24-3p	miR-27a-3p	miR-27b-3p	miR-29a-3p	miR-29c-3p	miR-34a-5p	miR-34b-3p	miR-497-5p	miR-9-5p	miR-92a-3p	miR-124-3p	miR-451a
UPENN 26	PBD3	Yes	2.41671	-0.118322	2.51941	-0.0619817	1.10086	-0.498737	1.66426	-1.24388	-0.0279467	1.50339	-0.751803	0.367132	0.279541	-0.204148	-0.456743	0.6189	-1.02684	3.62142	-3.67068	-0.234576	-0.721494	0.16678	-1.32656	-0.544148	0.859825	-1.7285	-0.252393	3.19596	1.11055	-0.207289	1.45573	-0.311375	7.47301	0.91208	0.018197	7.72586	3.5821	0.287668	-2.10691	-0.655188
UPENN 27	PBD3	No	-0.533292	0.662678	1.66841	1.13502	1.68386	-1.47874	-1.39174	2.86012	0.0490533	3.46839	0.493197	1.37713	-0.195459	1.12285	0.305257	0.7619	0.185155	-4.08458	1.44732	-0.259576	0.814506	-0.90422	0.193442	1.72485	1.33482	1.3115	1.07261	-4.07404	2.67355	2.77771	-3.90027	2.95262	UD	1.95608	-0.320803	3.38386	2.5721	0.935668	-1.41191	0.664812
UPENN 38	PBD3	Yes	-0.649292	-1.46832	1.87141	-2.07898	-2.48814	-0.189737	-1.52774	-3.27688	-3.64095	1.28739	-1.4988	-1.19687	-1.00346	-0.232148	-0.983743	-1.3431	-1.78584	1.96742	UD	-1.76158	-2.60249	-1.43222	-1.89256	-4.03615	-1.58218	-1.6655	-1.76839	3.45796	-0.19645	-2.89329	-0.68227	-2.89038	4.12701	-2.26392	-1.9878	1.12086	1.1901	-1.29433	12.4371	-2.08419
UPENN 40	PBD3	No	-0.680292	-2.51632	0.259415	1.65302	-1.08014	1.27126	6.85526	-1.14488	-0.361947	1.54739	-1.1748	-0.959868	-0.244459	1.42985	-1.02274	-1.5941	-1.38084	2.46942	UD	-1.46858	-1.52949	-0.57822	-1.68056	1.08485	-0.436175	-2.1155	1.44261	0.176959	-0.71445	0.501711	-0.62727	-1.07838	6.17501	0.28608	-0.513803	3.00986	1.6651	-1.54933	2.23109	-2.00119
Patient17	PBD3	Yes	-3.72829	-3.22132	-0.0985852	-2.77698	-1.68914	-2.13874	-1.11274	-2.97488	-2.17095	0.122395	-4.6078	-3.64987	-3.90846	-2.00815	-2.80574	-2.9701	-3.19784	0.401419	UD	-3.36658	-2.07749	-1.08222	-3.20256	-0.413148	-2.02718	-2.2785	-1.60739	1.47096	-3.78045	-1.64929	-0.43827	-2.88638	6.29001	-2.04492	-2.1968	-0.67314	0.0831024	-2.95933	11.4991	-1.89119
Patient18	PBD3	No	-0.234292	0.245678	1.53141	0.166018	1.09586	-0.930737	0.17326	2.74312	-0.151947	3.60439	0.987197	3.61413	0.872541	1.65785	0.361257	0.2929	-0.387845	6.21142	-0.136681	0.421424	0.149506	-1.08222	-0.0475575	2.85185	2.84282	1.5185	2.41261	5.82396	1.18555	2.04271	2.00873	0.914625	6.61901	1.86608	-1.2878	-5.81314	3.2691	0.354668	-3.57291	0.752812
Patient19	PBD3	Yes	-1.50429	-0.538322	3.25841	-1.82798	2.21386	-1.75274	-5.14274	1.63512	-0.846947	2.87739	1.2272	0.752132	-0.826459	0.146852	-1.17574	-0.9721	-1.08784	4.30442	3.47732	-0.995576	-0.759494	-0.73922	-1.25856	1.51385	1.43882	-0.348503	0.100607	6.46496	0.0105496	-0.131289	4.21673	0.183625	5.70801	1.57508	0.433197	-7.47214	3.4041	0.0456682	4.01509	-0.381188
Patient20	PBD3	No	1.34171	1.63868	UD	1.50302	-4.41314	3.37426	7.48326	2.85612	1.46505	2.10739	2.5202	2.21813	0.889541	1.29185	0.869257	1.6539	1.67316	-5.64358	-2.77668	1.83942	1.71551	0.44578	1.65844	3.92885	4.08282	1.0525	2.08461	4.07196	1.95255	3.47071	-10.1333	2.15962	-9.84499	2.65708	0.221197	-9.33914	5.8781	1.78967	-11.6539	1.70481
Patient21	PBD3	Yes	-2.61229	-1.64532	0.611415	-1.82198	1.71086	0.620263	4.94326	0.25112	-2.41395	0.320395	-1.5238	-1.03687	-2.83646	-0.886148	-2.00574	-2.4541	-2.28284	3.73542	-5.11868	-2.54558	-1.94449	-1.86622	-2.29756	0.882852	0.472825	-2.4605	-1.14139	2.70596	-2.18345	-0.951289	1.79073	-1.40638	6.37601	0.99908	-0.139803	3.26186	3.6011	-1.87833	-3.50491	-2.00719
UPENN 26	PBD7	Yes	UD	9.26168	-5.82159	3.02402	2.87186	-2.08274	-2.62474	4.21912	2.17005	-8.50061	9.4552	-2.42187	-2.17746	-6.51715	1.32826	5.6609	5.17416	-3.94958	3.77032	6.86942	5.47051	4.02778	5.80344	3.64285	-0.634175	4.5685	-4.81839	-3.63304	-2.00845	-3.44829	-2.44627	0.951625	-7.33599	-0.48192	UD	1.81286	-6.9239	7.69867	UD	6.23181
UPENN 27	PBD7	No	0.438708	-0.938322	3.56141	-0.229982	-0.432142	2.32626	-1.41574	-0.76188	1.53005	-5.26861	-0.420803	0.120132	2.71654	0.925852	0.294257	0.3299	1.67016	-4.45558	4.06932	0.445424	0.855506	0.77878	1.59344	-1.40315	-1.32518	-0.245503	-0.201393	4.89596	1.02255	0.448711	2.86673	0.499625	5.56601	-0.45892	0.956197	2.18186	-8.8129	0.466668	3.58009	-1.45619
UPENN 38	PBD7	Yes	-1.33029	-1.67332	0.533415	-1.33498	-2.36814	-0.796737	-3.53174	-2.99388	-1.55995	1.21339	-2.1898	-1.95287	0.526541	-0.349148	-1.05674	-1.5371	-1.56884	1.54742	-0.775681	-1.83358	-1.46249	-1.75222	-1.62556	-3.46815	-2.34018	-2.3555	-2.10939	2.52096	-1.85145	-2.37629	-0.0342696	-1.91838	4.14201	-2.74892	-1.3488	0.92586	4.2231	-2.06533	0.333093	-1.99619
UPENN 40	PBD7	No	3.10071	1.94868	-7.58659	3.59302	2.44886	0.260263	7.85726	1.13512	0.475053	-7.52661	0.838197	1.83613	1.35954	0.679852	3.29526	1.9389	1.87716	-5.92458	0.781319	3.24242	-0.332494	2.33678	2.00844	-0.915148	0.974825	0.805497	2.66061	-10.048	2.36655	1.58771	1.82073	0.659625	-2.91099	0.15208	3.0732	1.55086	5.2201	0.478668	-0.758907	1.64781
Patient17	PBD7	Yes	-1.02329	-1.87132	1.58541	-1.57998	-0.653142	-0.999737	-2.32674	-2.46988	-0.175947	1.46039	-1.6708	-2.26687	-0.165459	-0.595148	-1.39274	-2.8451	-1.69684	1.29142	-2.81868	-3.07958	-2.15549	-0.88322	-1.89656	-2.06015	-2.24918	-2.0385	-1.23439	3.88596	-2.62545	-1.61429	1.07473	-1.49938	4.95001	-1.37492	-0.615803	2.81986	0.341102	-2.77333	11.5871	-2.37219
Patient18	PBD7	No	-0.174292	0.180678	UD	-0.0989817	0.274858	-0.504737	-2.07374	-1.33688	0.112053	2.47139	-1.0228	-0.803868	0.853541	-0.788148	0.780257	0.4569	0.356155	6.26542	2.81232	0.366424	0.479506	1.36478	0.228442	-2.67115	-0.154175	1.7495	-0.169393	-5.77804	0.81955	0.603711	6.22873	1.09762	-17.439	-1.47592	0.850197	0.66786	-5.5179	-0.377332	-0.0999074	1.28881
Patient19	PBD7	Yes	0.587708	1.07468	2.36841	1.28902	1.17786	-0.612737	-6.87274	0.62412	1.96305	5.32039	0.463197	1.06413	1.33054	0.110852	1.41026	1.1969	1.23716	4.11842	1.17232	1.73642	1.54951	-0.27722	1.24844	0.373852	0.343825	2.2345	2.08461	-6.98204	0.30055	1.07571	-3.88727	1.69662	8.32501	0.0310805	-0.783803	7.79586	-2.9879	1.33067	-2.80691	2.38281
Patient20	PBD7	No	6.48071	3.62368	-5.09159	1.77202	2.58086	5.32126	6.28926	4.39612	5.32805	-3.48961	2.9682	5.60013	2.58854	3.86785	3.84026	5.1579	4.40416	UD	-0.098681	5.09842	5.55451	3.87478	5.13344	5.03085	2.19182	5.3825	5.29561	-4.31604	5.73655	4.54771	5.61773	4.05162	-11.027	4.17408	4.2692	-5.96614	-6.2239	3.79967	-3.62591	3.70081
Patient21	PBD7	Yes	-0.421292	-2.08832	1.79641	-1.32298	-2.73314	-0.0677374	-1.22474	-2.51888	-0.514947	2.24739	-1.7298	-1.03787	0.776541	1.71485	-0.601743	-2.3141	-0.609845	-6.28458	0.503319	-2.31958	-1.09949	-1.36022	-0.776558	-2.79515	-2.59718	-1.2565	-2.11539	4.59196	-2.17745	-2.27229	0.0327304	-2.03238	3.67601	-2.58292	0.069197	0.56386	2.2461	-2.23533	-0.843907	-1.29819
GroupC
Case	Collection	DCV	let-7a-5p	let-7b-5p	let-7c-5p	miR-103a-3p	miR-125b-5p	miR-1274b	miR-1298-5p	miR-132-3p	miR-142-3p	miR-142-5p	miR-146a-5p	miR-146b-5p	miR-150-5p	miR-155-5p	miR-15b-5p	miR-16-5p	miR-17-5p	miR-181a-5p	miR-181c-5p	miR-195-5p	miR-19b-3p	miR-204-5p	miR-20a-5p	miR-21-5p	miR-221-3p	miR-223-3p	miR-23a-3p	miR-23b-3p	miR-24-3p	miR-27a-3p	miR-27b-3p	miR-29a-3p	miR-29c-3p	miR-34a-5p	miR-34b-3p	miR-497-5p	miR-9-5p	miR-92a-3p	miR-124-3p	miR-451a
Patient22	PBD3	No	UD	1.56134	1.54883	1.26295	1.44238	0.423379	-0.643156	0.606511	0.745389	-0.998792	1.04432	-0.443066	0.195143	-1.21275	0.667198	-1.11843	1.32038	0.303383	1.32691	-0.382467	-0.106126	0.227109	1.14432	0.479367	-0.316981	0.663643	0.661642	1.05768	-0.294978	-0.185853	0.648101	0.669609	0.492783	0.512087	0.0607234	UD	0.863417	-0.350987	0.586373	-0.924148
Patient23	PBD3	No	1.76324	3.06134	2.02083	2.68195	2.87738	5.22838	1.55784	2.74551	2.96039	2.32621	2.38532	2.52193	0.145143	UD	2.8382	2.97257	3.90638	3.05238	2.40291	2.92853	2.80587	1.09711	2.98332	0.854367	2.20902	0.911643	1.41564	UD	2.30902	1.46215	1.4471	2.39461	2.92478	2.64409	1.47772	UD	2.69342	2.30601	1.19237	2.79385
Patient24	PBD3	Yes	-4.09976	-7.37866	-8.51817	-6.19405	-9.73162	-2.68462	-3.60816	-8.82849	-1.62961	-3.71479	-4.95768	-7.56107	-2.75386	-2.05575	-3.4638	-5.62243	-5.80062	-9.04562	-8.97709	-6.23947	-5.94813	0.141109	-5.12668	-4.59363	-9.06798	-2.85536	-4.31336	-6.97532	-8.36398	-6.27685	-8.1529	-9.79039	-9.87422	-7.63491	-3.59528	-6.72444	-9.12958	-3.27699	-10.0306	-5.54015
Patient25	PBD3	Yes	-2.48476	-1.59766	-0.283173	-2.18205	2.17838	0.164379	1.36884	0.452511	-2.91361	-3.27779	-0.917684	-1.49007	-1.10786	0.594247	-3.3048	-4.18243	-2.98662	-1.98662	-1.24909	-3.15347	-3.22113	-0.0578912	-2.98768	-1.25563	-0.539981	-2.52136	-1.95036	0.435681	-2.80898	-1.02585	0.593101	-1.72039	-1.39922	-0.373913	-0.000276586	UD	1.84642	-3.49999	2.62837	-3.44915
Patient26	PBD3	No	-0.471765	1.26434	3.08883	-0.715053	3.58538	1.09738	1.87184	1.26851	-0.012611	1.52821	0.103316	0.734934	0.838143	-3.58175	-0.566802	-0.69943	-0.0116222	0.808383	2.23291	0.0785334	-0.0861259	1.78911	0.0453245	-0.298633	-0.430981	1.42664	-0.507358	UD	-0.0809779	0.0741473	UD	0.883609	1.18378	-0.277913	1.96972	4.33556	4.97242	-1.22199	UD	-0.379148
Patient27	PBD3	No	0.376235	-0.639658	0.872827	-0.533053	3.35438	0.459379	UD	1.66251	0.209389	0.553208	1.66032	1.22993	1.38814	-3.34975	-0.706802	-0.54643	-1.43062	2.08738	1.78791	-0.138467	-0.362126	1.07011	-1.67568	0.468367	3.08102	0.178643	3.25864	2.06268	2.88202	1.43715	UD	2.72961	1.87478	2.90009	1.78072	UD	UD	-1.36099	2.36237	-1.94715

## Sheet: Plasma raw data
GroupA
Case	Collection	DCV	let-7a-5p	let-7b-5p	let-7c-5p	miR-103a-3p	miR-107	miR-125b-5p	miR-1274b	miR-132-3p	miR-142-3p	miR-142-5p	miR-146a-5p	miR-146b-5p	miR-150-5p	miR-155-5p	miR-15a-5p	miR-15b-5p	miR-16-5p	miR-17-5p	miR-181a-5p	miR-181c-5p	miR-195-5p	miR-19b-3p	miR-204-5p	miR-20a-5p	miR-21-5p	miR-221-3p	miR-223-3p	miR-23a-3p	miR-23b-3p	miR-24-3p	miR-27a-3p	miR-27b-3p	miR-29a-3p	miR-29b-3p	miR-29c-3p	miR-34a-5p	miR-34b-3p	miR-497-5p	miR-92a-3p	miR-451a
Patient1	PBD3	Yes	1.94504	2.11369	2.4359	2.82196	UD	1.11575	-0.100583	1.51453	1.75861	2.34571	3.36804	3.47416	1.42324	0.59662	1.72188	2.68442	0.326912	2.21677	2.99257	1.46636	0.150316	1.25032	1.16527	1.49363	1.82112	3.52222	2.60627	2.45977	0.569103	2.83768	2.4837	3.07839	2.03677	1.08903	0.851399	-0.134094	-1.9586	-0.299346	1.13197	0.233535
Patient7	PBD3	Yes	UD	2.85569	4.3499	6.35596	UD	2.65075	0.963417	2.40953	4.06061	3.70671	4.27504	4.03116	1.82824	1.57362	UD	4.48642	2.13491	3.68077	3.04857	3.88336	2.43132	3.09932	1.08827	3.13763	3.11612	5.05422	3.81827	1.22677	3.0241	3.89668	3.9127	4.45939	3.29177	3.96103	3.7434	1.21691	-0.173603	-0.159346	2.72397	2.41453
Patient12	PBD3	Yes	-0.848963	-0.431308	-1.0051	-1.31204	-0.177153	0.342748	-0.107583	-1.24547	-1.51239	-1.90029	-2.07196	-1.79184	0.698243	-0.47538	-1.98312	-1.63258	0.106912	-1.13523	-2.78443	-2.60164	-0.143684	-0.684676	-0.665735	-0.55337	-1.41288	-2.78078	-1.49973	-1.31523	-0.862897	-1.87232	-2.0323	-2.18561	-1.20223	-1.02497	-0.843601	0.456906	1.1774	-0.781346	-0.272033	1.23353
Patient13	PBD3	Yes	-1.04596	-0.739308	-1.0821	-1.52004	-1.15815	-0.475252	-0.575583	-1.49947	-1.91639	-2.32629	-2.63096	-2.26884	-1.04476	-0.77638	-3.72312	-2.08258	-1.02109	-1.54223	-1.71943	-1.66464	-0.760684	-1.34368	-0.0127345	-1.21937	-2.07888	-3.12278	-1.56773	-1.83723	-1.0699	-2.34432	-2.4533	-2.25561	-2.14923	0.287026	-1.7046	-0.239094	-1.8926	-1.83735	-1.15203	-0.423465
Patient14	PBD3	Yes	3.72795e-05	0.218692	0.289903	-0.602039	-0.656153	-0.861252	-1.34558	-0.186475	-1.94739	-1.78329	-2.21396	-1.97384	0.705243	0.39362	0.818876	-1.10658	1.02691	-1.13823	-1.36443	-1.76464	0.915316	-1.43268	0.387265	-0.92437	-2.11288	-3.23678	-1.33673	-1.61923	-1.9119	-2.11632	-2.0163	-1.72661	-1.60923	-1.30597	-0.847601	-1.01809	-1.5406	-1.52135	-0.065033	2.22753
Patient15	PBD3	Yes	-2.57696	-2.28731	-2.0571	-3.18104	-2.11915	-1.13025	-2.73858	-1.71147	-3.24939	-3.03729	-3.22396	-2.92084	-0.966757	-2.82038	-2.80312	-3.42858	-1.51909	-2.40723	-3.00043	-3.22664	-1.77768	-2.03168	-2.01473	-2.47237	-2.78488	-4.15978	-3.36673	-2.48223	-2.3409	-2.92732	-3.3153	-3.40561	-2.10623	-1.55097	-2.8206	-0.523094	-0.953603	-1.04535	-1.64903	-1.11047
Patient16	PBD3	Yes	-0.956963	-1.29331	-1.3541	-2.61504	-0.960153	-0.995252	-0.631583	-1.61847	-2.71039	-2.84729	-3.46996	-2.99884	-0.957757	-1.95038	-2.74712	-2.76058	-1.08309	-2.35823	-2.37743	-3.11264	-1.42368	-2.31468	-0.933735	-1.97437	-2.36788	-4.14278	-3.28773	-2.36623	-2.1169	-2.94832	-3.1293	-2.97361	-2.97323	-2.31197	-3.2806	-1.99709	-0.130603	-2.06135	-1.77303	-1.32147
Patient17	PBD3	Yes	-0.130963	-1.40931	-1.4781	-1.56304	-0.566153	-1.42625	-0.183583	-1.38947	-1.59639	-2.34129	-2.34896	-2.01384	-1.02476	-1.33038	-2.05212	-1.81058	-1.95409	-1.81123	-2.18943	-2.05664	-1.68668	-1.81768	-1.29473	-1.54437	-1.29988	-2.51878	-1.40773	-1.53623	-0.968897	-2.06632	-2.3983	-2.31461	-1.86823	0.262026	-1.8846	-0.442094	-0.522603	-1.06335	-1.38603	-2.23647
Patient3	PBD3	No	UD	2.60669	2.7489	2.53096	2.52085	2.95375	-0.352583	3.02453	2.96961	2.36371	3.45604	3.46116	1.49824	1.78762	1.56088	3.17642	1.61691	2.97577	3.73757	0.505364	1.03832	2.32732	UD	2.59263	1.96412	4.17522	3.74627	1.44277	0.542103	3.68568	3.5737	4.19339	2.57377	2.78403	2.2874	-0.295094	-0.793603	0.948654	2.02197	0.381535
Patient2	PBD3	No	3.83104	1.73169	1.7949	3.58596	2.22085	1.95475	1.89642	1.80953	3.58761	3.45271	4.18904	2.94416	0.600243	2.87662	1.92588	3.17242	0.537912	2.43877	3.91057	0.801364	0.789316	1.93532	2.49627	1.51763	2.55512	4.81322	3.10927	3.14377	2.1121	3.88268	3.0827	4.14239	2.35277	UD	2.0584	1.12091	1.2234	2.02665	1.72697	-0.138465
Patient4	PBD3	No	3.17804	1.97369	1.0909	2.97996	UD	2.06775	1.41342	1.93853	2.88661	2.24871	3.89304	3.33516	1.41524	2.91062	1.13188	3.21242	1.29291	2.29277	3.56457	5.43736	1.11032	1.84032	0.978265	2.21863	2.90512	4.04422	3.37327	2.66777	1.4811	3.43368	3.7617	3.30939	2.58977	UD	2.2634	1.29391	UD	0.873654	0.968967	0.493535
Patient5	PBD3	No	3.11804	1.70069	1.4339	2.85296	3.58085	-0.489252	2.10942	1.95053	3.81361	2.68571	3.87904	4.43216	1.62924	2.09262	1.83588	3.41042	1.06791	2.31977	2.77757	3.48436	0.913316	1.89532	0.945265	2.12363	2.79312	5.17922	3.78627	2.40477	1.7651	3.31768	3.0887	1.31539	1.57777	1.53203	1.7604	-0.255094	1.0654	0.898654	1.16397	0.663535
Patient6	PBD3	No	3.12104	1.55969	0.965903	2.71396	UD	0.658748	1.58742	2.40553	3.47661	2.16771	3.68204	3.69416	1.50624	2.72162	-1.18812	3.51542	1.10591	2.33577	3.38357	4.73636	1.27632	2.00832	2.16927	1.89963	2.68012	5.14022	3.59127	2.85677	3.4351	3.58168	3.4047	2.93539	2.42477	UD	2.8314	1.71091	1.3874	1.51065	1.59897	0.836535
Patient8	PBD3	No	3.03004	1.32769	0.658903	2.48096	2.64685	-0.798252	1.01542	1.30753	2.38361	2.17271	3.51104	2.76716	-0.0917571	2.35462	4.06088	2.17442	0.906912	2.15277	2.62957	3.72336	0.584316	1.86632	1.71127	1.95563	1.73312	3.72922	2.66627	2.08677	0.848103	2.63068	2.5537	1.01939	1.04677	3.41003	1.3194	-0.143094	-1.5766	0.491654	1.23897	0.287535
Patient9	PBD3	No	2.59404	0.541692	0.923903	1.10996	2.10985	0.645748	-0.804583	-0.00347488	2.49361	1.78471	2.77104	2.33616	0.642243	1.34862	1.38688	2.46442	-0.236088	0.70777	2.95057	3.69436	-0.0816838	0.569324	2.13727	0.67363	1.54812	3.84422	3.47227	1.74177	1.9011	2.71068	2.4167	2.24739	1.63777	UD	1.9504	0.0369059	0.208397	0.669654	0.067967	-1.03647
Patient10	PBD3	No	1.76204	-0.0953083	0.0449031	2.25896	UD	-0.693252	1.37042	1.47653	2.52861	1.52671	3.40104	2.61216	0.0162429	1.82562	2.71588	1.88142	-0.396088	0.47777	2.21857	3.45236	-0.0516838	0.217324	2.42427	0.45763	1.25012	3.89622	2.87827	3.10377	2.2281	2.65168	2.8827	3.01539	1.67677	0.909026	1.3314	1.06491	1.7314	2.99065	0.356967	-0.748465
Patient11	PBD3	No	-1.17196	-3.06731	-3.0581	-2.34604	-0.887153	-0.0972517	-0.112583	-1.11447	-1.30439	-1.63829	-1.13596	-1.52684	-1.74076	-1.09338	-1.38612	-1.83458	-3.69609	-2.68023	-2.00943	-1.28764	-3.50668	-2.76768	1.32827	-2.70237	-1.76888	-1.87778	-1.58073	-1.16023	-0.695897	-1.35632	-1.1223	-0.754613	-1.09923	0.434026	-2.0516	-0.429094	0.835397	-0.309346	-2.54403	-3.74747
Patient18	PBD3	No	1.30004	1.29969	1.4829	1.42896	2.28385	2.76375	1.89042	1.09353	0.584612	-0.0282948	-0.726958	-0.111835	0.866243	0.78662	UD	0.980419	1.78891	1.28577	0.0205678	-0.0946362	1.81432	0.828324	0.529265	1.31363	0.240116	-0.362782	0.682273	0.514768	1.1971	-0.0373206	-0.0773023	0.424387	0.779767	UD	0.907399	2.22291	-0.871603	2.40965	0.847967	2.05753
Patient1	PBD7	Yes	UD	3.57269	3.1319	3.85596	UD	0.895748	-0.911583	2.42253	2.40461	3.74571	4.53604	4.06516	2.44824	0.68662	2.89888	3.48042	3.02491	3.64577	3.56457	2.69336	2.88232	2.76232	0.568265	3.52863	3.06312	4.72622	3.03527	2.40177	1.9671	3.45268	3.6297	4.28639	2.72177	UD	2.5624	0.867906	-2.1916	1.95365	2.62897	2.46353
Patient7	PBD7	Yes	UD	1.75969	1.4529	3.26096	UD	0.998748	0.304417	0.867525	2.51761	3.28971	3.70204	3.14916	1.48224	2.13762	3.92388	3.43242	1.03091	2.46177	3.75257	5.21436	1.54132	1.49332	0.822265	1.82463	1.61612	3.83422	1.98927	1.96677	0.829103	3.29668	2.4047	2.57339	1.87177	UD	1.6374	0.612906	0.0403974	0.906654	0.742967	0.587535
Patient12	PBD7	Yes	-2.14196	-1.50731	-1.1151	-2.35504	-1.44315	-0.883252	-1.79558	-1.79847	-2.61539	-2.67229	-2.80296	-2.43184	0.0442429	-1.78438	-2.73912	-2.59758	-0.777088	-1.82523	-3.49743	-3.31364	-0.732684	-1.43968	-1.00573	-1.52937	-2.25688	-3.36678	-2.69273	-2.27723	-2.6369	-2.98232	-2.7353	-3.06961	-1.96223	-1.34997	-2.0876	-0.680094	-0.784603	-1.41435	-1.06203	0.111535
Patient13	PBD7	Yes	-0.951963	-0.683308	-1.0171	-2.01604	-0.681153	-0.684252	-0.445583	-1.72747	-1.77539	-2.19929	-2.45696	-2.23884	-1.65276	-1.52338	0.248876	-2.19358	-0.380088	-1.43623	-1.34643	-1.06964	-0.605684	-1.05168	-2.95273	-1.21337	-1.60488	-2.78778	-1.72173	-1.50123	-1.2439	-1.95032	-2.3293	-2.43561	-1.32423	-1.05497	-2.1896	0.432906	-1.1326	-0.895346	-0.352033	0.113535
Patient14	PBD7	Yes	-0.422963	-0.695308	-0.540097	-1.83304	-1.43815	-0.622252	-1.73358	-1.41747	-2.38339	-1.99529	-2.96896	-2.89984	-0.132757	-0.92738	-1.46312	-1.79858	-0.100088	-2.02823	-1.63443	-2.60264	-0.130684	-1.54368	-2.72573	-1.88237	-2.31888	-3.49078	-3.07173	-2.08723	-1.6419	-3.02132	-2.5103	-2.63561	-2.14823	-0.318974	-1.1016	-0.176094	-0.228603	-1.19535	-0.610033	0.878535
Patient15	PBD7	Yes	-2.28396	-2.09531	-1.9351	-3.11104	-1.79515	-1.98825	-1.43358	-2.14547	-3.40839	-3.27129	-2.97696	-2.95984	-2.16276	-2.59938	-2.37712	-3.70458	-1.42709	-2.36723	-3.39643	-3.21764	-1.55268	-2.16368	-2.75873	-1.99137	-2.41288	-3.93478	-3.12873	-2.46123	-2.6689	-3.07832	-3.3973	-3.51861	-2.15223	-2.00797	-2.9356	-1.49209	-0.144603	-1.09235	-1.45703	-1.17747
Patient16	PBD7	Yes	-1.93296	-1.82431	-1.2851	-3.14104	-1.86415	-1.20425	-1.14358	-2.10447	-3.24339	-3.11529	-3.71396	-3.12384	-0.992757	-2.40338	-1.96012	-3.13958	-1.49009	-2.64623	-2.55543	-2.80164	-1.60768	-2.13368	-0.595735	-2.28737	-2.84688	-4.23878	-3.73273	-2.63123	-2.4789	-3.47132	-3.5093	-3.39261	-2.63523	-2.34697	-3.1726	-1.94709	-1.8916	-2.07535	-2.22603	-1.71447
Patient17	PBD7	Yes	-0.449963	-0.703308	-0.511097	-1.70804	-0.652153	-1.24525	-0.639583	-1.25647	-2.41739	-2.29329	-2.44396	-2.15984	-0.501757	-1.42538	-0.588124	-2.03758	0.0759123	-1.49023	-2.43443	-2.45164	-0.0626838	-1.54168	-1.72273	-1.05637	-1.79188	-2.90478	-1.79473	-1.70523	-2.1849	-2.56732	-2.8813	-2.77761	-2.16823	-1.14197	-2.9206	-1.27809	-1.2106	-0.394346	-0.593033	0.394535
Patient3	PBD7	No	UD	-0.122308	0.380903	0.956961	2.24985	-0.577252	-1.33558	0.415525	1.21461	1.50871	1.73304	1.62416	-0.589757	0.24762	0.879876	1.40042	-1.00909	-0.47223	1.58157	0.179364	-0.865684	-0.732676	0.392265	-0.00737022	0.849116	2.92022	1.64627	2.55177	1.5321	1.14668	2.6547	2.57739	0.405767	3.08203	-0.255601	-1.57509	-1.8656	1.69765	-1.22903	-1.37447
Patient2	PBD7	No	2.48304	0.632692	0.534903	2.11096	3.12785	0.233748	0.110417	0.778525	2.33161	1.99371	3.38704	2.22216	0.690243	1.92262	2.15688	2.19742	0.169912	1.38277	1.79157	2.42736	-0.141684	1.05832	1.96927	0.59763	1.59812	4.04122	1.99427	2.67977	3.5951	2.39568	2.7517	2.58139	1.87977	4.58003	2.2164	0.564906	1.7924	0.873654	0.484967	-0.346465
Patient4	PBD7	No	1.11704	1.33869	1.6969	2.39496	UD	1.40675	0.203417	2.25053	2.61261	4.92571	3.67604	2.92016	1.44524	1.87162	0.686876	3.36542	1.08891	2.23277	4.63657	3.59736	1.20732	2.04332	2.11327	2.12563	2.76512	3.75622	3.10827	2.71677	2.3941	3.54068	3.1907	3.09439	2.87177	UD	2.0534	0.775906	-0.679603	1.35565	0.742967	0.466535
Patient5	PBD7	No	1.75904	2.17169	1.9259	2.84396	UD	1.12475	2.21442	0.0395251	2.60661	2.84271	1.69504	2.57016	0.720243	1.69162	UD	3.76342	1.38891	2.69977	3.41457	-0.646636	1.63232	2.35132	0.0852655	2.47163	1.59012	4.10622	2.97827	1.79977	1.5171	3.07968	2.4677	2.50639	1.85177	UD	0.901399	-0.348094	0.780397	0.0836535	1.69297	1.02053
Patient6	PBD7	No	1.44104	-3.48331	-3.1761	-2.00604	-0.763153	-2.77825	0.412417	-1.87447	-1.02339	-2.27929	-0.962958	-1.46784	-3.12276	-0.24738	-2.57912	-1.78658	-4.04109	-3.16023	-1.80343	-3.16964	-3.44668	-3.51968	-1.87673	-3.51737	-2.04588	-1.27178	-2.99973	-1.35223	-0.409897	-1.29132	-1.3763	-0.708613	-2.42223	-0.708974	-1.9716	-1.98909	-2.3806	-1.21635	-3.17503	-4.27747
Patient8	PBD7	No	UD	1.26969	-0.0950969	2.53696	2.24985	-2.11225	-0.667583	0.902525	2.41961	2.45271	3.33304	2.80516	0.474243	2.22962	3.37488	2.60642	1.09691	2.38477	3.31457	4.61936	1.09032	1.81832	0.207265	2.06663	1.78312	4.64622	2.85727	2.30277	1.0421	2.46368	2.8817	0.316387	0.853767	UD	1.1854	-0.00609414	0.939397	0.698654	1.00097	0.323535
Patient9	PBD7	No	1.69204	1.25769	0.632903	1.93096	UD	0.785748	-0.641583	0.114525	2.14061	2.39471	2.32404	2.34316	1.01424	2.16562	4.51188	2.58642	0.176912	1.33177	2.08057	2.09936	0.616316	0.732324	1.80927	1.24563	1.47612	3.39722	2.98727	1.98677	2.2441	2.49768	1.8817	2.04039	1.76777	-1.66797	1.2304	0.292906	UD	0.835654	0.697967	-0.411465
Patient10	PBD7	No	2.13904	0.554692	0.133903	2.02996	2.94285	-0.226252	-0.072583	0.896525	1.57661	1.44471	3.08904	2.65316	0.913243	2.80262	4.16188	2.17042	0.0149123	0.58877	2.11257	4.69736	0.545316	0.527324	2.62327	0.40163	1.43312	3.03922	2.06427	1.77477	1.2621	2.03668	2.6377	2.17239	1.36777	0.484026	2.3194	0.488906	1.8984	0.761654	0.462967	-0.250465
Patient11	PBD7	No	-2.87796	-2.71531	-2.4891	-3.75904	-2.68915	-1.55725	-2.09258	-2.40747	-3.72139	-3.73629	-3.65396	-3.91484	-0.940757	-2.93938	-0.605124	-3.82458	-2.13509	-3.10123	-3.55043	-3.93764	-1.64068	-2.92168	-1.57673	-2.53837	-3.27588	-4.37478	-3.82273	-3.19123	-2.8549	-3.88832	-4.1563	-3.76261	-3.18523	-1.71497	-3.2496	-1.75109	0.770397	-2.09635	-2.17703	-1.79647
Patient18	PBD7	No	0.768037	0.839692	0.960903	0.0379609	0.553847	1.05775	0.225417	0.0915251	-0.667388	-0.764295	-1.75496	-1.03684	1.86324	0.66362	0.0948761	0.0554192	1.77091	0.19977	-1.33543	0.699364	1.37132	-0.377676	-0.615735	-0.0783702	-1.10188	-1.48778	-0.551727	-0.767232	0.316103	-1.40832	-1.1063	-0.749613	-0.652233	3.51503	0.175399	-0.123094	0.429397	-0.283346	0.030967	2.78753
HC1			-0.888963	-0.199308	-0.283097	-0.345039	-0.142153	0.900748	1.14842	0.575525	1.04561	1.51971	0.119042	-0.156835	-0.833757	-1.23538	0.901876	-0.416581	1.61891	1.30277	-0.424432	0.983364	0.887316	2.29632	-0.375735	1.14063	1.77012	-0.534782	0.490273	0.0157675	0.0341028	0.445679	1.0687	0.759387	1.76377	UD	2.1874	0.954906	1.6564	1.11965	0.903967	1.88453
HC2			-1.28496	-0.717308	-0.224097	-0.722039	-0.108153	1.36675	0.782417	-0.192475	0.590612	0.528705	-1.40996	-1.19084	-0.609757	-1.15038	-0.649124	-1.34158	0.857912	-0.17523	-1.68143	-1.33264	0.389316	1.07232	0.305265	0.28363	0.640116	-2.01978	-0.412727	-1.08323	-0.499897	-1.26632	-0.485302	-0.326613	0.485767	1.54303	0.881399	0.264906	1.6424	0.126654	0.137967	1.07053
HC3			-1.84596	-0.901308	-0.973097	-2.48704	-0.970153	-0.225252	0.214417	-1.07947	-2.53039	-3.02129	-2.50096	-2.33184	-1.26576	-1.39838	-2.26112	-2.58158	-0.0570877	-1.49823	-2.65743	-3.10564	-0.837684	-1.06468	-2.05173	-1.28137	-1.40488	-3.17378	-2.03773	-2.23523	-1.9519	-2.65032	-3.1613	-2.78361	-2.53123	-2.18397	-2.3196	-0.433094	1.2004	-1.27435	-0.632033	0.372535
HC4			-2.45096	-1.27131	-1.1451	-2.41104	-1.71515	-0.306252	0.579417	-1.53247	-0.763388	-0.119295	-2.61796	-2.35684	-1.35376	-2.18038	-0.812124	-2.08658	0.507912	-0.98523	-1.70343	-1.00564	0.0583162	1.07632	0.328265	-0.50937	0.238116	-2.40678	-1.34373	-1.42823	-0.808897	-1.81532	-0.486302	-0.706613	-0.198233	0.927026	0.391399	-0.125094	2.7784	-0.525346	-0.335033	0.875535
HC5			-2.31496	-0.952308	-1.1821	-2.90204	-1.62015	-0.649252	0.536417	-0.545475	-1.88239	-1.97829	-2.25696	-2.00384	-0.755757	-2.35038	-2.61912	-2.24958	-0.0420877	-0.89823	-3.16343	-2.87064	-0.170684	-0.0966764	-0.392735	-0.52437	-0.561884	-2.17578	-1.50773	-1.56123	-1.1699	-1.33932	-1.8023	-1.33361	-1.12823	-1.82797	-0.578601	0.657906	1.2364	-0.300346	0.311967	0.611535
HC6			-0.379963	0.928692	1.4679	-1.00304	0.440847	0.350748	1.13142	0.550525	-0.946388	-0.514295	-0.237958	-0.322835	-0.675757	-0.85738	0.131876	-0.654581	0.673912	0.88677	-0.641432	0.377364	0.780316	0.846324	-1.43373	0.84263	0.333116	-0.212782	0.215273	-0.0112325	0.313103	0.500679	-0.349302	-0.0916125	0.811767	-0.970974	0.226399	1.27891	1.5914	-0.0463465	1.42497	0.829535
HC7			-2.39696	-0.645308	-1.0881	-1.54604	-0.799153	0.144748	1.20242	0.0535251	-1.58739	-0.430295	-1.48996	-1.59684	-0.248757	-1.11138	-1.53912	-1.71458	-0.103088	-0.36623	-1.68743	-2.78764	0.297316	0.537324	0.136265	-0.29837	-0.031884	-1.78978	-0.835727	-1.12923	-0.897897	-0.970321	-0.922302	-0.750613	-0.104233	-1.75797	0.397399	1.09891	1.4774	0.0466535	0.674967	0.589535
HC8			-2.45996	-1.33431	-1.1311	-2.56204	-1.72115	-0.903252	0.162417	0.0515251	-2.28139	-1.42329	-1.54196	-2.13784	-0.574757	-2.14838	-0.623124	-2.41558	-0.985088	-1.35023	-1.97543	-2.17164	-1.02868	-0.764676	-1.76073	-1.54537	-1.29188	-2.53078	-2.39173	-1.98223	-1.9249	-1.76732	-1.8103	-1.80061	-1.09023	-1.31197	-0.0836007	0.895906	-1.6306	-0.0803465	-0.526033	-0.760465
GroupB
Case	Collection	DCV	let-7a-5p	let-7b-5p	let-7c-5p	miR-103a-3p	miR-107	miR-125b-5p	miR-1274b	miR-132-3p	miR-142-3p	miR-142-5p	miR-146a-5p	miR-146b-5p	miR-150-5p	miR-155-5p	miR-15a-5p	miR-15b-5p	miR-16-5p	miR-17-5p	miR-181a-5p	miR-181c-5p	miR-195-5p	miR-19b-3p	miR-204-5p	miR-20a-5p	miR-21-5p	miR-221-3p	miR-223-3p	miR-23a-3p	miR-23b-3p	miR-24-3p	miR-27a-3p	miR-27b-3p	miR-29a-3p	miR-29b-3p	miR-29c-3p	miR-34a-5p	miR-34b-3p	miR-497-5p	miR-92a-3p	miR-451a
UPENN 26	PBD3	Yes	1.61445	1.46177	-0.149293	1.43479	UD	UD	1.53349	1.38735	0.634504	0.557517	1.50959	1.21742	0.0373473	1.47634	UD	0.990522	1.65619	1.79319	4.1515	UD	1.82297	1.30139	UD	1.79325	1.53656	0.86925	0.961926	1.55616	3.32958	1.64362	0.441732	1.23425	0.892867	2.92876	1.80193	1.85873	UD	-0.788549	1.523	0.501773
UPENN 38	PBD3	Yes	1.66845	1.90377	UD	2.28379	UD	1.28778	1.75349	0.751351	0.616504	0.757517	2.92359	2.42242	-0.128653	3.29534	UD	2.60252	1.54019	2.30819	1.8045	UD	0.87697	1.32139	1.31429	2.16125	1.17756	2.82725	1.00893	1.15716	3.09758	2.01662	0.626732	1.51825	0.476867	UD	UD	0.450734	UD	0.345451	1.636	0.705773
Patient17	PBD3	Yes	-0.114545	-1.41823	-0.632293	-0.414205	0.473464	0.542783	0.121486	-1.05065	-1.0185	-0.0224828	0.30459	0.169415	-0.180653	-0.423659	UD	-0.123478	-2.17581	-1.31181	-0.4525	UD	-2.08003	-1.53361	-0.269714	-1.46575	-0.550436	-0.17275	0.0769261	0.562157	0.00258393	0.0986184	-0.368268	-0.097746	0.105867	-0.806238	0.362926	-0.0682662	UD	1.63245	-1.513	-2.72923
Patient19	PBD3	Yes	-3.81055	-2.81823	-1.44329	-3.29621	-2.50454	-0.635217	-1.71851	-1.90765	-2.9355	-2.11648	-2.82041	-2.81758	-1.30765	-3.78466	UD	-3.37648	-2.34581	-3.31681	-3.3865	UD	-2.82503	-2.18861	-2.19671	-3.18975	-2.55444	-2.53175	-2.95707	-2.82584	-2.95642	-2.96938	-2.43227	-2.35975	-1.74613	1.45176	-1.83707	-1.16627	UD	-0.981549	-2.396	-2.19423
Patient21	PBD3	Yes	-0.159545	0.575766	-0.439293	0.0647946	-0.673536	1.65478	0.557486	1.20835	-0.707496	-0.705483	1.01959	0.461415	2.76335	1.91834	UD	-0.0464778	0.238191	0.649186	1.3225	UD	0.0879698	0.183392	2.62129	0.360252	0.658564	0.67425	0.679926	0.692157	0.365584	0.894618	0.347732	0.126254	1.08987	0.487762	0.835926	2.67673	UD	0.767451	1.143	-0.262227
Patient20	PBD3	No	-2.78655	-1.75523	-0.902293	-2.54421	-1.73454	-1.70922	-2.06451	-1.62765	-2.8055	-1.64448	-1.88241	-2.11758	-0.547653	-2.40766	UD	-2.31848	-1.59381	-2.31681	-2.2725	UD	-1.81603	-1.76261	-0.421714	-2.22375	-1.34044	-2.06575	-1.90607	-1.68084	-2.27542	-1.64938	-1.67327	-1.62275	-1.52613	-2.02724	-0.463074	-1.74527	UD	-1.71255	-1.341	-1.51323
UPENN 27	PBD3	No	1.27945	1.61777	0.499707	2.23379	UD	UD	0.325486	0.0913511	3.2285	5.19252	2.16759	2.35042	0.588347	0.981341	UD	2.05452	1.46919	2.24619	1.6115	UD	1.20097	2.64639	UD	2.30025	1.88356	2.82325	2.09393	1.06916	1.43358	1.88862	3.11173	1.98425	2.13287	UD	1.64793	-0.0662662	UD	0.0724515	1.266	1.68177
UPENN 40	PBD3	No	-1.15955	-2.32323	-0.333293	-1.14421	0.447464	0.144783	-0.423514	-1.44365	1.8485	-0.507483	-2.27541	-1.83558	-0.476653	-0.745659	UD	-1.46948	-1.84681	-1.54681	-1.4335	UD	-1.76903	-0.416608	-1.07671	-1.60675	-0.0404361	-1.82275	-1.05807	-1.53884	-0.929416	-1.38438	0.385732	-0.629746	-0.347133	1.44676	0.334926	-0.152266	UD	-1.45455	-1.81	-1.41123
UPENN 39	PBD3	No	-0.923545	-0.713234	-0.0762931	-0.0642054	0.705464	0.0487831	-1.30851	-0.441649	1.0485	-0.0174828	-1.61141	-1.44058	-1.33365	-0.846659	UD	-0.591478	0.143191	-1.45681	-0.8105	UD	-0.35603	-0.234608	-1.09771	-1.23175	-0.588436	-0.90575	-1.13507	-1.41984	-0.679416	-1.40038	-0.523268	-0.517746	-0.850133	UD	0.644926	-1.32827	UD	-0.158549	-0.358004	2.81777
UPENN 41	PBD3	No	-0.742545	-0.440234	1.07271	0.731795	0.177464	1.04578	0.684486	-1.35565	2.4765	1.60652	-0.87441	-0.728585	0.0433473	-1.20566	UD	-0.380478	0.575191	-0.373814	0.3385	UD	0.15697	0.987392	-0.324714	-0.289748	0.309564	-0.97175	-0.0840739	-0.928843	-0.0644161	-0.434382	0.461732	0.434254	0.765867	UD	0.610926	-0.535266	UD	0.968451	0.318996	2.02577
Patient18	PBD3	No	0.0254549	-0.354234	UD	-0.628205	-0.226536	1.56378	-0.646514	0.997351	-2.0665	-0.825483	-0.59541	-0.232585	0.861347	-0.667659	UD	-0.176478	-0.310809	-0.724814	-0.9705	UD	-0.19403	-1.34661	-0.695714	-0.500748	-0.840436	-0.42075	-0.237074	0.0381572	-0.472416	-0.672382	-0.520268	-0.583746	-0.950133	-1.09124	-0.758074	-0.600266	UD	0.429451	-0.413004	-0.670227
UPENN 26	PBD7	Yes	5.66545	5.31177	UD	4.41979	UD	UD	0.307486	3.54635	3.1295	UD	3.30859	3.59842	1.54935	2.33534	UD	4.33752	3.47119	4.69519	2.5775	UD	4.40297	3.03739	UD	4.19125	2.85756	5.20825	3.83193	2.91916	UD	3.84562	2.58373	2.33125	3.80187	1.51276	UD	2.87473	UD	UD	2.821	4.33277
UPENN 38	PBD7	Yes	-0.717545	0.101766	-0.491293	-0.0812054	UD	-0.509217	-0.0885141	-1.43365	1.3015	0.495517	-0.58041	-0.926585	-3.01665	-0.055659	UD	0.0185222	0.285191	-0.255814	-0.4085	UD	-0.13403	0.517392	0.282286	-0.269748	-0.0184361	-0.24675	-0.848074	-0.835843	0.167584	-0.615382	0.481732	-0.021746	-0.436133	UD	0.688926	-1.25027	UD	0.0204515	-0.313004	0.787773
UPENN 33	PBD7	Yes	2.50745	2.39077	UD	2.27279	0.982464	UD	2.58949	2.77935	1.8335	0.907517	2.08059	2.22942	0.185347	1.87634	UD	1.28552	1.01219	3.33819	2.5265	UD	1.50097	2.12139	UD	3.10625	1.50956	1.90825	3.29393	2.50316	1.24558	3.16062	1.32473	1.75925	1.67487	2.08176	UD	3.88373	UD	UD	1.622	0.802773
Patient17	PBD7	Yes	-1.00955	-0.499234	0.332707	-1.78021	-1.46854	UD	-0.742514	-0.782649	-2.5945	-2.28348	-0.64141	-1.00358	-0.149653	-0.928659	UD	-1.49048	-0.689809	-0.951814	-0.8685	UD	-0.20303	-1.18761	-1.34471	-0.899748	-0.841436	-1.77675	-0.907074	-0.782843	-1.00542	-0.807382	-2.25927	-1.03075	-1.44913	-1.72424	-0.534074	-0.230266	UD	-0.800549	0.271996	-1.25723
Patient19	PBD7	Yes	-2.09355	-1.41823	0.647707	-2.53721	-2.27654	-1.05322	-1.17351	-0.869649	-3.6225	-2.75448	-1.49341	-1.79858	-1.27065	-2.46166	UD	-2.46048	-1.66781	-2.33581	-2.7325	UD	-2.00203	-2.39061	-0.409714	-2.21975	-2.08844	-2.28575	-2.11407	-1.46184	-1.93842	-2.13538	-2.62027	-2.10875	-1.85813	-2.36824	-1.42507	-1.30327	UD	-1.42855	-1.375	-2.54423
Patient21	PBD7	Yes	-1.84955	-0.984234	-0.0742931	-1.76621	-1.64154	-0.814217	-1.79451	-0.911649	-2.9985	-2.35548	-0.69741	-1.26358	-0.0606527	-1.24066	UD	-1.58448	-1.54781	-1.45581	-0.7195	UD	-0.97203	-1.55661	0.140286	-1.22975	-1.51744	-1.14775	-1.42907	-0.676843	-1.53042	-1.33638	-1.62727	-1.95875	-1.46013	-1.39424	-1.00007	-0.751266	UD	-1.57455	-0.689004	-1.27523
Patient20	PBD7	No	-2.78055	-2.60823	-0.177293	-2.89321	-1.81954	-1.21622	-2.09051	-1.90865	-2.5295	-1.71948	-2.86141	-2.53758	-0.945653	-2.82666	UD	-2.55548	-1.81581	-2.72781	-2.5695	UD	-1.79503	-1.96761	1.34229	-2.37775	-1.83444	-2.94775	-2.28607	-2.07984	-2.03342	-2.76638	-2.03127	-1.90575	-1.89013	-1.41224	-1.24507	-1.53927	UD	-1.27355	-1.911	-1.26723
UPENN 27	PBD7	No	2.22845	0.439766	-1.17229	2.00379	6.58346	-2.23922	0.699486	0.425351	1.8875	0.906517	2.15759	2.59542	-0.121653	1.91934	UD	2.20752	-0.547809	1.08519	UD	UD	-0.51903	-0.201608	1.19829	0.771252	-0.474436	2.62125	1.04793	1.14816	0.460584	1.13362	0.851732	-0.874746	-0.674133	1.15576	0.357926	-2.16827	UD	-1.18055	-0.707004	-1.42723
UPENN 40	PBD7	No	1.60145	0.617766	2.09771	1.12779	0.895464	UD	3.54449	1.85935	4.6015	3.31852	1.57859	1.09042	0.705347	1.00734	UD	1.46452	1.78219	2.65419	2.7845	UD	3.05197	3.11439	UD	2.60625	3.05156	0.41925	1.78593	2.17316	1.99258	1.85962	3.45673	2.84025	2.04987	UD	UD	2.45473	UD	3.15845	1.544	1.40177
UPENN 39	PBD7	No	0.662455	0.672766	1.44771	0.934795	0.785464	0.623783	0.402486	1.08735	1.8485	1.52352	0.43759	0.703415	-0.0556527	0.387341	UD	0.992522	1.32319	1.08619	0.6075	UD	1.01197	1.46039	0.329286	0.844252	1.73556	0.97325	1.20193	0.581157	1.06258	0.768618	1.10673	1.41925	1.23687	1.36276	1.62093	0.152734	UD	UD	0.560996	1.71877
UPENN 41	PBD7	No	2.10945	2.22277	UD	2.09179	1.46446	1.11578	1.26349	-0.193649	1.2105	2.37252	1.88959	2.24842	2.31535	4.78934	UD	2.51552	1.98519	1.85519	1.7225	UD	1.74997	1.27939	-0.0227143	1.76725	0.747564	1.85025	1.58693	1.02416	2.04558	1.61762	1.08773	1.54725	1.44587	UD	UD	0.326734	UD	5.27245	1.81	1.78677
Patient18	PBD7	No	0.708455	-0.358234	UD	-0.661205	1.03846	0.482783	-0.826514	0.683351	-1.6845	-1.25048	-1.41141	-0.730585	1.15935	-0.669659	UD	-0.0774778	0.341191	-0.727814	-1.3455	UD	0.0529698	-1.45761	1.00529	-0.462748	-1.48744	-0.73875	-0.462074	-0.128843	-0.230416	-1.03538	-0.862268	-0.428746	-1.48213	-0.903238	-1.31507	-0.764266	UD	-0.393549	-0.720004	-0.106227
GroupC
Case	Collection	DCV	let-7a-5p	let-7b-5p	let-7c-5p	miR-103a-3p	miR-107	miR-125b-5p	miR-1274b	miR-132-3p	miR-142-3p	miR-142-5p	miR-146a-5p	miR-146b-5p	miR-150-5p	miR-155-5p	miR-15a-5p	miR-15b-5p	miR-16-5p	miR-17-5p	miR-181a-5p	miR-181c-5p	miR-195-5p	miR-19b-3p	miR-204-5p	miR-20a-5p	miR-21-5p	miR-221-3p	miR-223-3p	miR-23a-3p	miR-23b-3p	miR-24-3p	miR-27a-3p	miR-27b-3p	miR-29a-3p	miR-29b-3p	miR-29c-3p	miR-34a-5p	miR-34b-3p	miR-497-5p	miR-92a-3p	miR-451a
Patient22	PBD3	No	0.887663	1.53293	1.82625	1.46784	0.725065	2.25392	1.07776	1.40142	0.394039	0.5413	1.53968	1.70827	3.2413	2.69144	0.924447	1.76515	1.65049	1.95831	2.15799	2.80894	1.8445	1.55111	0.75564	2.01009	1.87898	1.539	1.46728	1.87215	1.8053	1.62604	1.16932	1.24439	1.45887	1.80088	0.99893	2.54805	-0.845727	1.45935	2.14181	1.07365
Patient23	PBD3	No	-3.95234	-2.28707	-2.58775	-3.43716	-3.73594	-2.80708	-1.00524	-1.76258	-2.47896	-2.2267	-2.67632	-2.96273	-4.4287	-2.85056	0.307447	-3.05485	-1.28151	-2.30769	-3.43301	-3.52406	-1.7005	-1.53989	-1.84036	-1.91891	-2.30002	-3.305	-2.69072	-2.92485	-3.3917	-2.95996	-2.31768	-2.42361	-2.60813	-1.55412	-2.86407	-2.18195	-1.33373	-1.81865	-1.56619	-1.43935
Patient24	PBD3	Yes	-0.174337	1.27993	1.06825	0.764836	1.13406	0.49992	0.722761	1.02942	1.17804	1.9343	0.349676	1.01627	1.4483	0.374443	1.69345	1.06215	1.88749	1.12631	0.736992	0.492943	1.2435	1.26611	-0.96136	1.15409	1.15498	0.524001	1.04128	0.989154	0.580297	0.688038	1.50132	1.56339	1.17587	UD	1.09993	0.240052	5.41027	0.754351	1.01881	1.72065
Patient25	PBD3	Yes	2.96366	-0.229071	0.781252	1.60884	2.61206	1.50792	-0.183239	1.90542	2.75404	3.3863	2.06368	2.03227	1.1243	0.871443	1.68545	2.67215	-0.611513	0.60331	1.30099	1.64194	-0.240504	-0.019886	4.93964	0.541086	1.63798	2.335	2.06728	2.01815	2.8243	1.70004	3.35432	2.68739	0.934874	3.86688	1.00193	-0.106948	0.961273	0.205351	-1.21619	-0.676354
Patient26	PBD3	No	-0.072337	0.723929	0.328252	0.519836	0.821065	0.59792	0.559761	1.21942	-0.720961	0.0902997	0.226676	0.47427	-0.0947046	-0.123557	0.604447	0.368153	0.198487	0.72431	0.570992	-0.319057	0.418496	0.065114	0.52864	0.667086	0.566978	0.557001	0.382279	0.968154	0.225297	0.512038	-0.117679	0.993393	-0.0581264	0.491875	-0.56907	0.214052	1.62627	-0.261649	0.557806	-0.385354
Patient27	PBD3	No	3.54366	0.682929	2.11825	2.03584	1.17706	6.67992	-0.263239	0.691425	3.93104	1.9383	2.71268	1.25727	3.2843	0.577443	0.502447	2.13415	0.314487	1.38531	3.03399	4.09694	1.0835	0.975114	-0.0993595	1.49209	1.37998	1.718	1.74428	0.911154	0.837297	1.57304	1.91732	1.25339	1.65687	0.664875	4.92493	-0.489948	2.09427	1.21535	0.638806	0.168646
